# 1 A serological assay to detect SARS-CoV-2 seroconversion in humans

2

3 Fatima Amanat<sup>1,2</sup>, Thi H.O. Nguyen<sup>3</sup>, Veronika Chromikova<sup>1</sup>, Shirin Strohmeier<sup>1,4</sup>, Daniel Stadlbauer<sup>1</sup>,  
4 Andres Javier<sup>1</sup>, Kaijun Jiang<sup>1</sup>, Guha Asthagiri Arunkumar<sup>1,2</sup>, Jose Polanco<sup>1,5</sup>, Maria Bermudez-Gonzalez<sup>1</sup>,  
5 Daniel Caplivski<sup>6</sup>, Allen Cheng<sup>7</sup>, Katherine Kedzierska<sup>3</sup>, Olli Vapalahti<sup>8,9,10</sup>, Jussi M. Hepojoki<sup>8,11</sup>, Viviana  
6 Simon<sup>1,12,13</sup> and Florian Krammer<sup>1\*</sup>

7

8 <sup>1</sup>*Department of Microbiology, Icahn School of Medicine at Mount Sinai, New York, NY, USA*

9 <sup>2</sup>*Graduate School of Biomedical Sciences, Icahn School of Medicine at Mount Sinai, New York, NY, USA*

10 <sup>3</sup>*Department of Microbiology & Immunology, University of Melbourne, The Peter Doherty Institute for  
11 Infection & Immunity, Melbourne, Victoria, Australia*

12 <sup>4</sup>*Department of Biotechnology, University of Natural Resources and Life Sciences, Vienna, Austria*

13 <sup>5</sup>*Department of Genetics and Genomic Sciences, Icahn School of Medicine at Mount Sinai, New York, NY,  
14 USA*

15 <sup>6</sup>*Travel Medicine Program, Division of Infectious Diseases, Icahn School of Medicine at Mount Sinai, New  
16 York, NY, USA*

17 <sup>7</sup>*School of Public Health and Preventive Medicine, Monash University; Infection Prevention and  
18 Healthcare Epidemiology Unit, Alfred Health*

19 <sup>8</sup>*Department of Virology, Medicum, University of Helsinki, Helsinki, Finland*

20 <sup>9</sup>*Veterinary Biosciences, Veterinary Faculty, University of Helsinki, Helsinki, Finland*

21 <sup>10</sup>*Department of Virology and Immunology, Helsinki University Hospital (HUSLAB), Helsinki, Finland*

22 <sup>11</sup>*Institute of Veterinary Pathology, Vetsuisse Faculty, University of Zürich, Zürich, Switzerland*

23 <sup>12</sup>*Global Health Emerging Pathogens Institute, Icahn School of Medicine at Mount Sinai, NY, USA*

24 <sup>13</sup>*Division of Infectious Diseases, Department of Medicine, Icahn School of Medicine at Mount Sinai, New  
25 York, NY, USA*

26

27 \*To whom correspondence should be addressed: [florian.krammer@mssm.edu](mailto:florian.krammer@mssm.edu)

28

29

## 30 Abstract

31 *Introduction:* SARS-Cov-2 (severe acute respiratory disease coronavirus 2), which causes Coronavirus  
32 Disease 2019 (COVID19) was first detected in China in late 2019 and has since then caused a global  
33 pandemic. While molecular assays to directly detect the viral genetic material are available for the  
34 diagnosis of acute infection, we currently lack serological assays suitable to specifically detect SARS-CoV-  
35 2 antibodies.

36 *Methods:* Here we describe serological enzyme-linked immunosorbent assays (ELISA) that we developed  
37 using recombinant antigens derived from the spike protein of SARS-CoV-2. These assays were developed  
38 with negative control samples representing pre-COVID 19 background immunity in the general  
39 population and samples from COVID19 patients.

40 *Results:* The assays are sensitive and specific, allowing for screening and identification of COVID19  
41 seroconverters using human plasma/serum as early as 3 days post symptom onset. Importantly, these  
42 assays do not require handling of infectious virus, can be adjusted to detect different antibody types and  
43 are amendable to scaling.

44 *Conclusion:* Serological assays are of critical importance to determine seroprevalence in a given  
45 population, define previous exposure and identify highly reactive human donors for the generation of  
46 convalescent serum as therapeutic. Sensitive and specific identification of Coronavirus SARS-Cov-2  
47 antibody titers will also support screening of health care workers to identify those who are already  
48 immune and can be deployed to care for infected patients minimizing the risk of viral spread to  
49 colleagues and other patients.

50

## 51 **Introduction**

52 On December 31<sup>st</sup>, 2019 China reported first cases of atypical pneumonia in Wuhan, the capital of Hubei  
53 province. The causative virus was found to be a betacoronavirus, closely related to the severe acute  
54 respiratory syndrome coronavirus (SARS-CoV-1) from 2003 and similar to *Sarbecoviruses* isolated from  
55 bats.<sup>1,2</sup> It was therefore termed SARS-CoV-2 and the disease it causes was named COVID19 (COroNaVirus  
56 Disease 2019).<sup>3</sup> The outbreak in Wuhan expanded quickly and led to the lockdown of Wuhan, the Hubei  
57 province and other parts of China. While the lockdown, at least temporarily, brought the situation under  
58 control in China, SARS-CoV-2 spread globally causing a pandemic with, so far, 150,000 infections and  
59 5,500 fatalities (as of March 16<sup>th</sup>, 2020).

60 Nucleic acid tests that detect the SARS-CoV-2 RNA genome were quickly developed and are now widely  
61 employed to diagnose COVID19 disease.<sup>4,5</sup> However, there remains a great need for laboratory assays  
62 that measure antibody responses and determine seroconversion. While such serological assays are not  
63 well suited to detect acute infections, they support a number of highly relevant applications. First,  
64 serological assays allow us to study the immune response(s) to SARS-CoV-2 in dynamic qualitative and  
65 quantitative manner. Second, serosurveys are needed to determine the precise rate of infection in an  
66 affected area, which is an essential variable to accurately determine the infection fatality rate. Third,  
67 serological assays will allow for the identification of individuals who mounted strong antibody responses  
68 and who could serve as donors for the generation of convalescent serum therapeutics. Lastly, serological  
69 assays will permit to determine who is immune and who is not. This would be very useful for deploying  
70 immune healthcare workers in a strategic manner as to limit the risk of exposure and spread of the virus  
71 inadvertently.

72 *Sarbecoviruses* express a large (approximately 140 kDa) glycoprotein termed spike protein (S, a  
73 homotrimer), which mediates binding to host cells via interactions with the human receptor angiotensin  
74 converting enzyme 2 (ACE2).<sup>6-8</sup> The S protein is very immunogenic with the receptor-binding domain  
75 (RBD) being the target of many neutralizing antibodies.<sup>9</sup> Individuals infected with coronaviruses typically  
76 mount neutralizing antibodies, which might be associated with some level of protection for a period of  
77 months to years, and neutralizing response has demonstrated for SARS-CoV-2 in an individual case from  
78 day 9 onwards.<sup>10-13</sup> Serum neutralization can be measured using live virus but the process requires  
79 several days and must be conducted under biosafety level 3 laboratory containment for SARS-CoV-2  
80 Potentially, pseudotyped viral particle entry assays based on lentiviruses or vesicular stomatitis virus can

81 be used as well, but these reagents are not trivial to produce. A simple solution is the use of a binding  
82 assay, e.g. an enzyme linked immunosorbent assays (ELISA), with recombinantly expressed antigen as  
83 substrate. Here we report the development of such an assay and provide a protocol for both  
84 recombinant antigen production as well as the ELISA.

85

## 86 **Results**

### 87 **Expression constructs and generation of recombinant SARS-Cov-2 proteins**

88 We generated two different versions of the spike protein. The first construct expresses a full length  
89 trimeric and stabilized version of the spike protein and the second only the much smaller receptor  
90 binding domain (RBD). The sequence used for both proteins is based on the genomic sequence of the  
91 first virus isolate, Wuhan-Hu-1, which was released on January 10<sup>th</sup> 2020.<sup>1</sup> Sequences were codon  
92 optimized for mammalian cell expression. The full-length spike protein sequence was modified to  
93 remove the polybasic cleavage site, which is recognized by furin and to add a pair of stabilizing  
94 mutations (**Figure 1**).<sup>7,14,15</sup> These two modifications were included to enhance the stability of the protein  
95 based on published literature.<sup>7,14</sup> At amino acid P1213 the sequence was fused to a thrombin cleavage  
96 site, a T4 foldon sequence for proper trimerization and a C-terminal hexahistidine tag for purification  
97 (**Figure 1**).<sup>16,17</sup> The sequence was cloned into a pCAGGS vector for expression in mammalian cells and  
98 into a modified pFastBac Dual vector for generation of baculoviruses and expression in insect cells. For  
99 expression of the RBD, the natural N-terminal signal peptide of S was fused to the RBD sequence (amino  
100 acid 419 to 541) and joined with a C-terminal hexahistidine tag.<sup>18</sup> The same vectors as for the full length  
101 S protein were used to express the RBD. In mammalian cells, the RBD domain gave outstanding yields  
102 (approximately 25 mg/liter culture), but expression was lower in insect cells (approximately 0.4 mg/liter  
103 culture). Clear single bands were visible when the recombinant RBD proteins were analyzed on a  
104 reducing sodium dodecyl sulfate–polyacrylamide gel electrophoresis (SDS-PAGE), with the insect cell  
105 derived protein (iRBD) running slightly lower than the mammalian cell derived protein (mRBD) (**Figure**  
106 **1**). The size difference likely reflects differences in glycan sizes between insect cells and mammalian  
107 cells. The full-length S protein was expressed in both systems with slightly higher yields in mammalian  
108 cells (mSpike) than in insect cells (iSpike) (approximately 2 mg/liter cultures versus 0.5 mg/liter culture).  
109 The full-length protein appeared as a double band on a reducing SDS-PAGE, the higher species likely  
110 being the full-length protein and the slightly lower species likely a cleavage product.

111

### 112 **ELISA development**

113 We used a panel of 59 banked human serum samples collected from study participants including  
114 participants with confirmed previous viral infections (e.g., hantavirus, dengue virus, coronavirus NL63 –  
115 sample take 30 days post symptom onset) to establish an ELISA with these proteins. These human sera  
116 were used to test the background reactivity to the SARS-CoV-2 spike in the general US population  
117 covering an age range from approximately 20 to 65+ years. Four plasma/serum samples from three  
118 COVID19 patients were used to determine the reactivity of SARS-CoV-2 infected individuals to the RBD  
119 and the full length spike.

120 ELISAs were performed by doing serial dilution of the individual serum samples. Values from the dilution  
121 curves were used to determine the area under the curve (AUC), which was graphed. All COVID10  
122 plasma/serum samples reacted strongly to both RBD and full-length spike protein while reactivity of the  
123 other serum samples only yielded background reactivity (**Figure 2**). Reactivity of COVID19 sera was, in  
124 general, stronger against the full-length S protein than against the RBD, likely reflecting the higher  
125 number of epitopes found on the much larger spike protein. For the RBD the difference between  
126 control sera and convalescent sera was larger when the insect cell derived protein was used as  
127 compared to the mammalian cell derived RBD. The same was true for the full-length spike protein. The  
128 assay allowed to clearly distinguish the convalescent sera from the banked control sera.

129

### 130 **Antibody isotyping and subtyping**

131 For the four COVID19 patient plasma/sera, we also performed an isotyping and subtyping ELISA using  
132 the insect cell and mammalian cell expressed S proteins. Strong reactivity was found for all samples for  
133 IgG3, IgM and IgA (**Figure 3**). An IgG1 signal was also detected for three out of the four samples, while  
134 one sample showed no reactivity. No signal was detected for IgG4 and reagents for IgG2 were  
135 unavailable.

136

### 137 **Discussion**

138 Here we describe a serological method to detect seroconversion upon SARS-CoV-2 infection. The  
139 method is based on reactivity to the immunogenic S protein of the virus. It is relatively simple and quick  
140 in its execution and can be performed at biosafety level 2 level as it does not involve live virus. We have  
141 tested these methods using banked serum samples obtained from study participants in 2019 and early  
142 2020 when this virus was not widely circulating in the US. These serum samples produced low, close to  
143 baseline signals in our ELISA. Since the age range of the participants was broad, ranging from to 65+  
144 years of age, it is likely that most had experienced infections with human coronaviruses including the  
145 alphacoronaviruses NL63 and 229E as well as the betacoronaviruses OC43 and HKU1. We included  
146 paired serum samples (acute and convalescent) from a participant with a laboratory confirmed  
147 coronavirus NL63 infection. Our data show that there is no or only negligible cross-reactivity from human  
148 coronaviruses to SARS-CoV-2. Of note, even infection with the human alphacoronavirus NL63, which  
149 also uses ACE2 as receptor<sup>19</sup>, did not induce cross-reactivity. This is of great importance because it  
150 suggests that humans are completely naïve to SARS-CoV-2, which may explain the relatively high  $R_0$  of  
151 SARS-CoV-2 compared to other respiratory viruses such as influenza virus.<sup>20</sup> It might also suggest that  
152 antibody-dependent enhancement from human coronavirus induced cross-reactive antibodies targeted  
153 at the S protein is unlikely to be the cause of the high pathogenicity of the virus in humans.<sup>21</sup>

154 The plasma/sera used in this study from patients with COVID19 were obtained at day 20 (SARS-CoV2  
155 #1), at day 4 (SARS-CoV-2 #2), days 2 and 6 (SARS-CoV-2 #3A and B) post symptom onset. Our data  
156 shows significant seroconversion after natural infection with SARS-CoV-2. Our results suggest that  
157 antibodies mounted upon infection target the full length S protein as well as the RBD, which is the major  
158 target for neutralizing antibodies for related viruses coronaviruses.<sup>9</sup> In fact, sample SARS-CoV2 #1 was  
159 tested in another study in neutralization assays and showed a neutralizing titer of 1:160.<sup>13</sup> Thus,

160 seroconversion may lead to protection at a minimum for a limited time. Interestingly, the IgG3 response  
161 was stronger than the IgG1 response which is in contrast to e.g. the immune response to influenza  
162 where usually IgG1 responses dominates.<sup>22,23</sup> Lastly, we also detected strong IgA and IgM responses in  
163 the blood compartment. Of note, level of reactivity and antibody isotypes matched expected patterns  
164 based on time since symptom onset very well.

165 We believe that our ELISA method will be key for serosurveys aimed at determining the real attack rate  
166 and infection fatality rate in different human populations and to map the kinetics of the antibody  
167 response to SARS-CoV-2. In addition, clinical trials with convalescent serum as therapeutic have been  
168 initiated in China (e.g. NCT04264858) and anecdotal evidence from the epidemic in Wuhan suggests that  
169 compassionate use of these interventions was successful. China has recently shipped convalescent sera  
170 to Italy for use in patients and efforts to produce convalescent serum batches are ongoing in the US as  
171 well. Screening sera using our assay would be faster and easier than performing standard neutralization  
172 assays in BSL3 containment laboratories. Patients recovering from COVID19 disease could be screened  
173 for strong antibody responses using the assays described here, especially the one using the RBD as  
174 substrate since anti-RBD antibodies likely correlate with virus neutralization. In addition, the assay could  
175 be used to screen health care workers to allow selective deployment of immune medical personnel to  
176 care for patients with COVID19. Such a strategy would likely limit nosocomial spread of the virus. Of  
177 course, the generated recombinant proteins are also excellent reagents for vaccine development and  
178 can serve as baits for sorting B cells for monoclonal antibody generation. We are making the methods  
179 and laboratory reagents widely available to the research community in order to support the global effort  
180 to limit and mitigate spread of SARS-CoV-2.

181

182

183

## 184 **Methods**

### 185 **Recombinant proteins**

186 The mammalian cell codon optimized nucleotide sequence coding for the spike protein of SARS-CoV-2  
187 isolate (GenBank: MN908947.3) was synthesized commercially (GeneWiz). The receptor binding  
188 domain (RBD, amino acid 319 to 541, RVQP...CVNF) along with the signal peptide (amino acid 1-14,  
189 MFIF...TSGS) plus a hexahistidine tag was cloned into mammalian expression vector pCAGGS as well as  
190 in a modified pFastBacDual vectors for expression in baculovirus system. The soluble version of the spike  
191 protein (amino acids 1-1213, MFIF...IKWP) including a C-terminal thrombin cleavage site, T4 foldon  
192 trimerization domain and hexahistidine tag was also cloned into pCAGGS. The protein sequence was  
193 modified to remove the polybasic cleavage site (RRAR to A) and two stabilizing mutations were  
194 introduced as well (K986P and V987P, wild type numbering). Recombinant proteins were produced  
195 using the well-established baculovirus expression system and this system has been published in great  
196 detail in <sup>16,24,25</sup> including a video guide. Recombinant proteins were also produced in Expi293F cells  
197 (ThermoFisher) by transfections of these cells with purified DNA using ExpiFectamine 293 Transfection  
198 Kit (ThermoFisher). Supernatants from transfected cells were harvested on day 3 post-transfection by  
199 centrifugation of the culture at 4000 g for 20 minutes. Supernatant was then incubated with 6 mls Ni-  
200 NTA agarose (Qiagen) for 1-2 hours at room temperature. Next, gravity flow columns were used to  
201 collect the Ni-NTA agarose and the protein was eluted. Each protein was concentrated in Amicon

202 centrifugal units (EMD Millipore) and re-suspended in phosphate buffered saline (PBS). Proteins were  
203 analyzed on reducing SDS-PAGE. The DNA sequence for all constructs is available from the Krammer  
204 laboratory. Several of the expression plasmids and proteins have also been submitted to BEI Resources  
205 and can be requested from their web page for free (<https://www.beiresources.org/>).  
206

### 207 **SDS-PAGE**

208 Recombinant proteins were analyzed via a standard SDS-PAGE gel to check protein integrity. One ug of  
209 protein was mixed with 2X Laemmli buffer containing 5% beta-mercaptoethanol (BME) at a ratio of 1:1.  
210 Samples were heated at 100 °Celsius for 15 minutes and then loaded onto a polyacrylamide gel (5% to  
211 20% gradient; Bio-Rad). Gels were stained with SimplyBlue SafeStain (Invitrogen) for 1-2 hours and then  
212 de-stained in distilled water overnight.  
213

214

215

### 215 **Human samples**

216 Banked human samples were collected from study participants enrolled in ongoing IRB approved  
217 longitudinal observational study protocols of the Mount Sinai Personalized Virology Initiative. Samples  
218 were selected based on the date of collection (2019, early 2020) and whether participants had a  
219 documented history of viral infection. Samples were collected in the Clinical Research Unit at the Icahn  
220 School of Medicine at Mount Sinai after obtaining written consent and all participants agreed to sample  
221 banking and future research use. Self-reported ethnicities of the individuals from which samples were  
222 tested included Caucasian, Asian, African American and Hispanic. Samples included sera from a  
223 participant with acute NL63 infection as determined by the Biofire Respiratory panel. We included  
224 serum collected at day 3 post symptom onset as well as convalescent serum from the same person (day  
225 30 post symptom onset). In addition, we tested convalescent sera from individuals with dengue,  
226 chikungunya and hantavirus infections. These samples served as negative controls given that they were  
227 collect prior to SARS-Cov-2 spread in the US. Six subjects were 20-29, 19 were 30-39, 13 were 40-49, 7  
228 were 50-59 years old and six were 60 or older. For the mRBD ELISAs sera from additional nine t subjects  
229 were tested (30-39: 2; 40-49: 4; 50-59: 2; 60+: 1).

230 De-identified samples from the University of Melbourne and University of Helsinki were used as positive  
231 controls. For those, human experimental work was conducted according to the Declaration of Helsinki  
232 Principles and according to the Australian National Health and Medical Research Council Code of  
233 Practice. All participants provided written informed consent prior to the study. The studies were  
234 approved by the Alfred Hospital (ID #280/14) and University of Melbourne (ID #1442952.1, 1955465.2)  
235 Human Research Ethics Committees, and under research permit for project TYH2018322 of Helsinki  
236 University Hospital Laboratory.  
237

238

### 238 **ELISA**

239 The ELISA protocol was adapted from previously established protocols <sup>26,27</sup>. Ninety-six well plates  
240 (Immulon 4 HBX; Thermo Scientific) were coated overnight at 4°Celsius with 50 ul per well of a 2 ug/ml  
241 solution of each respective protein suspended in PBS (Gibco). The next morning, the coating solution  
242 was removed and 100 ul per well of 3% non-fat milk prepared in PBS with 0.1% Tween 20 (TPBS) was  
243 added to the plates at room temperature (RT) for 1 hour as blocking solution. Serum samples were  
244 heated at 56°C for 1 hour before use to reduce risk from any potential residual virus in serum. Serial  
245 dilutions of serum and antibody samples were prepared in 1% non-fat milk prepared in TPBS. The  
246 blocking solution was removed and 100 ul of each serial dilution was added to the plates for 2 hours at  
247 RT. Next, the plates were washed thrice with 250ul per well of 0.1% TPBS. Next, a 1:3000 dilution of goat  
248 anti-human IgG-horseradish peroxidase (HRP) conjugated secondary antibody (ThermoFisher  
249 Scientific) was prepared in 0.1% TPBS and 100 ul of this secondary antibody was added to each well for 1

250 hour. Plates were again washed thrice with 0.1% TBS. Once completely dry, 100  $\mu$ l of SigmaFast OPD (o-  
251 phenylenediamine dihydrochloride; Sigma-Aldrich) solution was added to each well. This substrate was  
252 left on the plates for 10 minutes and then the reaction was stopped by addition of 50  $\mu$ L per well of 3 M  
253 hydrochloric acid (HCl). The optical density at 490 nanometers was measured via a Synergy 4 (BioTek)  
254 plate reader. The background value was set at and optical density 490nm of 0.11 and area under the  
255 curve (AUC) was calculated. AUC values below 1 were assigned a value of 0.5 for graphing and  
256 calculation purposes. Data was analyzed in Prism 7 (Graphpad).

257  
258 To assess the distribution of the different antibody isotypes/subclasses in the samples that reacted well  
259 in our standard ELISA, another ELISA was performed with different secondary antibodies<sup>23</sup>. These  
260 antibodies include anti-human IgA ( $\alpha$ -chain-specific) HRP antibody (Sigma A0295) (1:3,000), anti-human  
261 IgM ( $\mu$ -chain-specific) HRP antibody (Sigma A6907) (1:3,000), anti-human IgG1 Fc-HRP (Southern Biotech  
262 9054-05) (1:3,000), anti-human IgG3hinge-HRP (Southern Biotech 9210-05) (1:3,000), and anti-human  
263 IgG4 Fc-HRP (Southern Biotech 9200-05).

264

## 265 **Acknowledgements**

266 We would like to thank Yong-Zhen Zhang (Fudan University) and Eddie Holmes (University of Sydney) for  
267 sharing the sequence of the first SARS-CoV-2 isolate in a very timely manner. We thank Jill Garlick and  
268 Janine Roney (Alfred Hospital, Melbourne) for data and specimen collection. We are also thankful to  
269 Genewiz for speeding up gene synthesis for this project, and being very accommodating to our needs.  
270 Furthermore, we want to thank Donna Tidmore for help with ordering primers with near light speed and  
271 and finally Susie (Changsu) Dong for commuting to New Jersey on several occasions to pick up reagents  
272 from Genewiz. We also thank the study participants for providing biospecimen for research purposes  
273 and the Conduits: Mount Sinai Health System Translational Science Hub (NIH grant U54TR001433) for  
274 supporting sample collection. The work of the Personalized Virology Initiative is supported by  
275 institutional funds and philanthropic donations. This work was partially supported by the NIAID Centers  
276 of Excellence for Influenza Research and Surveillance (CEIRS) contract HHSN272201400008C, the  
277 Australian National Health and Medical Research Council (NHMRC) NHMRC Program Grant (1071916)  
278 and NHMRC Research Fellowship Level B (#1102792), the Academy of Finland and Helsinki University  
279 Hospital Funds (TYH2018322). Finally, we want to thank the three COVID19 patients for their  
280 contribution to research and wish them a speedy recovery.

281

## 282 **Conflict of interest**

283 The authors declare no conflict of interest.

284

## 285 **References**

- 286 1. Wu F, Zhao S, Yu B, et al. A new coronavirus associated with human respiratory disease in China.  
287 Nature 2020.
- 288 2. Zhou P, Yang XL, Wang XG, et al. A pneumonia outbreak associated with a new coronavirus of  
289 probable bat origin. Nature 2020.

- 290 3. Gorbalenya AE, Baker SC, Baric RS, et al. The species Severe acute respiratory syndrome-related  
291 coronavirus: classifying 2019-nCoV and naming it SARS-CoV-2. *Nature Microbiology* 2020.
- 292 4. Chu DKW, Pan Y, Cheng SMS, et al. Molecular Diagnosis of a Novel Coronavirus (2019-nCoV)  
293 Causing an Outbreak of Pneumonia. *Clin Chem* 2020.
- 294 5. Corman VM, Landt O, Kaiser M, et al. Detection of 2019 novel coronavirus (2019-nCoV) by real-  
295 time RT-PCR. *Euro Surveill* 2020;25.
- 296 6. Letko M, Marzi A, Munster V. Functional assessment of cell entry and receptor usage for SARS-  
297 CoV-2 and other lineage B betacoronaviruses. *Nat Microbiol* 2020.
- 298 7. Wrapp D, Wang N, Corbett KS, et al. Cryo-EM structure of the 2019-nCoV spike in the prefusion  
299 conformation. *Science* 2020.
- 300 8. Walls AC, Park YJ, Tortorici MA, Wall A, McGuire AT, Velesler D. Structure, Function, and  
301 Antigenicity of the SARS-CoV-2 Spike Glycoprotein. *Cell* 2020.
- 302 9. Berry JD, Hay K, Rini JM, et al. Neutralizing epitopes of the SARS-CoV S-protein cluster  
303 independent of repertoire, antigen structure or mAb technology. *MAbs* 2010;2:53-66.
- 304 10. Liu W, Fontanet A, Zhang PH, et al. Two-year prospective study of the humoral immune  
305 response of patients with severe acute respiratory syndrome. *J Infect Dis* 2006;193:792-5.
- 306 11. Callow KA, Parry HF, Sergeant M, Tyrrell DA. The time course of the immune response to  
307 experimental coronavirus infection of man. *Epidemiol Infect* 1990;105:435-46.
- 308 12. Choe PG, Perera RAPM, Park WB, et al. MERS-CoV Antibody Responses 1 Year after Symptom  
309 Onset, South Korea, 2015. *Emerg Infect Dis* 2017;23:1079-84.
- 310 13. Haveri A, Smura T, Kuivanen S, et al. Serological and molecular findings during SARS-CoV-2  
311 infection: the first case study in Finland, January to February 2020. *Eurosurveillance* 2020.
- 312 14. Pallesen J, Wang N, Corbett KS, et al. Immunogenicity and structures of a rationally designed  
313 prefusion MERS-CoV spike antigen. *Proc Natl Acad Sci U S A* 2017;114:E7348-E57.
- 314 15. Kirchdoerfer RN, Cottrell CA, Wang N, et al. Pre-fusion structure of a human coronavirus spike  
315 protein. *Nature* 2016;531:118-21.
- 316 16. Krammer F, Margine I, Tan GS, Pica N, Krause JC, Palese P. A carboxy-terminal trimerization  
317 domain stabilizes conformational epitopes on the stalk domain of soluble recombinant hemagglutinin  
318 substrates. *PLoS One* 2012;7:e43603.
- 319 17. Margine I, Palese P, Krammer F. Expression of Functional Recombinant Hemagglutinin and  
320 Neuraminidase Proteins from the Novel H7N9 Influenza Virus Using the Baculovirus Expression System. *J*  
321 *Vis Exp* 2013.
- 322 18. Li F, Li W, Farzan M, Harrison SC. Structure of SARS coronavirus spike receptor-binding domain  
323 complexed with receptor. *Science* 2005;309:1864-8.
- 324 19. Wu K, Li W, Peng G, Li F. Crystal structure of NL63 respiratory coronavirus receptor-binding  
325 domain complexed with its human receptor. *Proc Natl Acad Sci U S A* 2009;106:19970-4.
- 326 20. Li Q, Guan X, Wu P, et al. Early Transmission Dynamics in Wuhan, China, of Novel Coronavirus-  
327 Infected Pneumonia. *N Engl J Med* 2020.
- 328 21. Tseng CT, Sbrana E, Iwata-Yoshikawa N, et al. Immunization with SARS coronavirus vaccines  
329 leads to pulmonary immunopathology on challenge with the SARS virus. *PLoS One* 2012;7:e35421.
- 330 22. Nachbagauer R, Choi A, Izikson R, Cox MM, Palese P, Krammer F. Age Dependence and Isotype  
331 Specificity of Influenza Virus Hemagglutinin Stalk-Reactive Antibodies in Humans. *MBio* 2016;7.
- 332 23. Rajendran M, Nachbagauer R, Ermler ME, et al. Analysis of Anti-Influenza Virus Neuraminidase  
333 Antibodies in Children, Adults, and the Elderly by ELISA and Enzyme Inhibition: Evidence for Original  
334 Antigenic Sin. *MBio* 2017;8.
- 335 24. Amanat F, Duehr J, Oestereich L, Hastie KM, Ollmann Saphire E, Krammer F. Antibodies to the  
336 Glycoprotein GP2 Subunit Cross-React between Old and New World Arenaviruses. *mSphere* 2018;3.



- 337 25. Margine I, Palese P, Krammer F. Expression of functional recombinant hemagglutinin and  
338 neuraminidase proteins from the novel H7N9 influenza virus using the baculovirus expression system. *J*  
339 *Vis Exp* 2013:e51112.
- 340 26. Amanat F, Meade P, Strohmeier S, Krammer F. Cross-reactive antibodies binding to H4  
341 hemagglutinin protect against a lethal H4N6 influenza virus challenge in the mouse model. *Emerg*  
342 *Microbes Infect* 2019;8:155-68.
- 343 27. Wohlbold TJ, Podolsky KA, Chromikova V, et al. Broadly protective murine monoclonal  
344 antibodies against influenza B virus target highly conserved neuraminidase epitopes. *Nat Microbiol*  
345 2017;2:1415-24.

346

## 347 **Figure legends**

348

349 **Figure 1: Constructs for recombinant protein expression.** **A** Visualization of the trimeric spike protein of  
350 SARS-CoV-2 based on PBD # 6VXX using Pymol.<sup>8</sup> One monomer is colored in dark blue while the  
351 remaining two monomers are held in light blue. The receptor binding domain (RBD) of the dark blue  
352 trimer is highlighted in red. **B** Schematic of the wild type full length spike protein with signal peptide,  
353 ectodomain, receptor binding domain, furin cleavage site, S1, S2, and transmembrane and endodomain  
354 domain indicated. **C** Schematic of the soluble trimeric spike. The polybasic/furin cleavage site (RRAR)  
355 was replaced by a single A. The transmembrane and endodomain were replaced by a furin cleavage site,  
356 a T4 foldon tetramerization domain and a hexahistidine tag. Introduction of K986P and V987P has been  
357 shown to stabilize the trimer in the pre-fusion conformation. **D** Schematic of the soluble receptor  
358 binding domain construct. All constructs are to scale. **E** Reducing SDS PAGE of insect cell and mammalian  
359 cell derived soluble trimerized spike protein (iSpike and rSpike). **F** Reducing SDS PAGE of insect cell  
360 derived and mammalian cell derived recombinant receptor binding domain (iRBD and mRBD).

361 **Figure 2: Reactivity of control and SARS-CoV-2 convalescent sera to different spike antigens.** **A-D**  
362 Reactivity to insect cell derived RBD (iRBD), mammalian cell derived RBD (mRBD), insect cell derived  
363 soluble spike protein (iSpike) and mammalian cell derived soluble spike protein (sSpike). Sera from three  
364 SARS-CoV-2 infected individuals were used and are shown in shades of red. Two samples are from the  
365 same patient but from different time points (SARS-CoV-2 #3A and #3B). One sample, shown in green, is  
366 a convalescent serum sample post NL63 infection. **E-F** shows data from the same experiment but  
367 graphed as area under the curve (AUC) to get a better quantitative impression. The n for the control  
368 samples is 50 except for the iRBD were it is 59. Statistics were performed using a student's t-test in  
369 Graphpad Prism.

370 **Figure 3: Isotypes and subtypes of antibodies from SARS-CoV-2 convalescent sera to the soluble spike**  
371 **protein.** Insect cell derived (**A**) and mammalian cell derived (**B**) spike protein was used to study  
372 isotype/subclass distribution of antibodies. The different samples are indicated by different symbols.  
373 Sera from three SARS-CoV-2 infected individuals were used and are shown in shades of red. Two  
374 samples are from the same patient but from different time points (SARS-CoV-2 #3A and #3B).

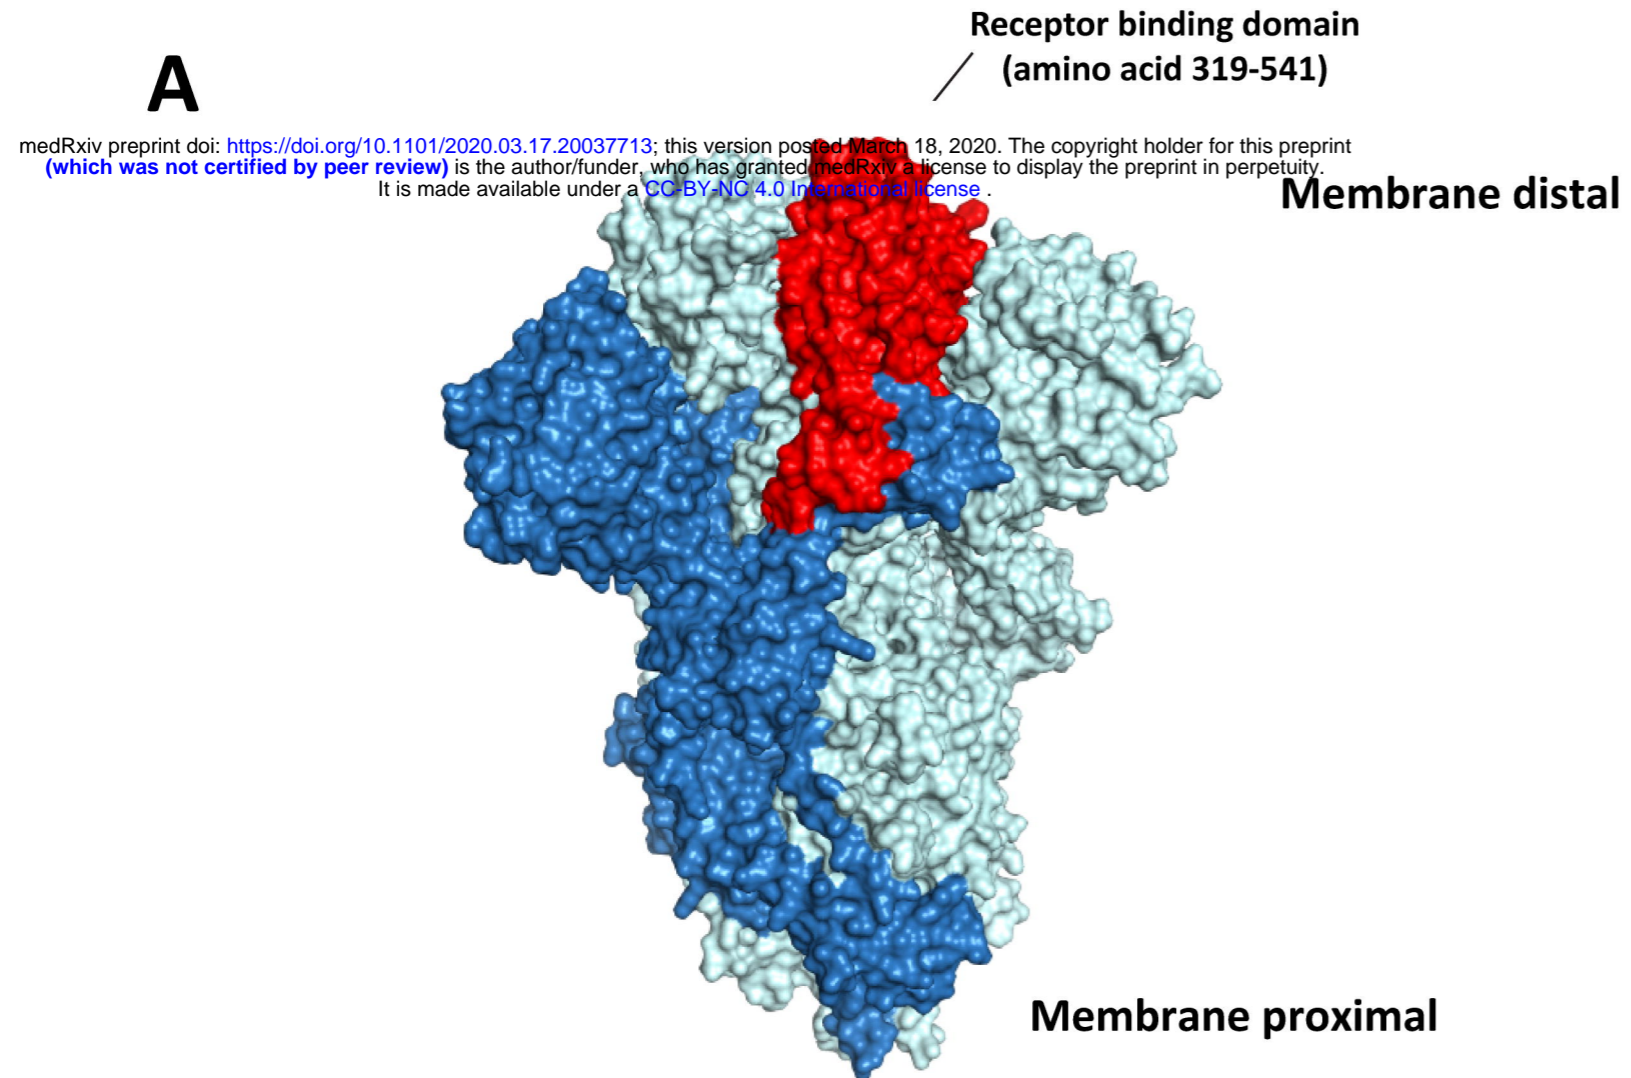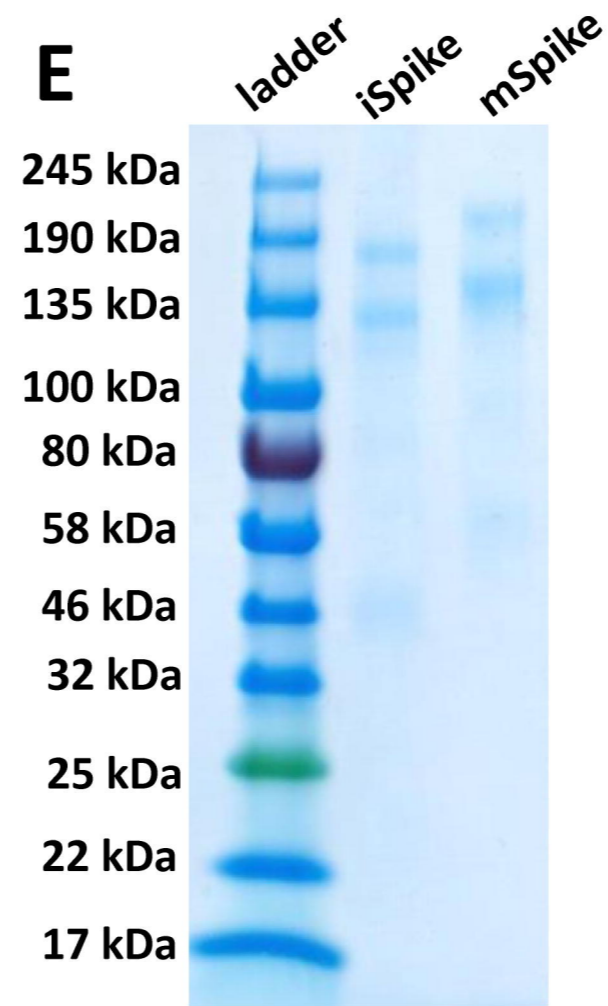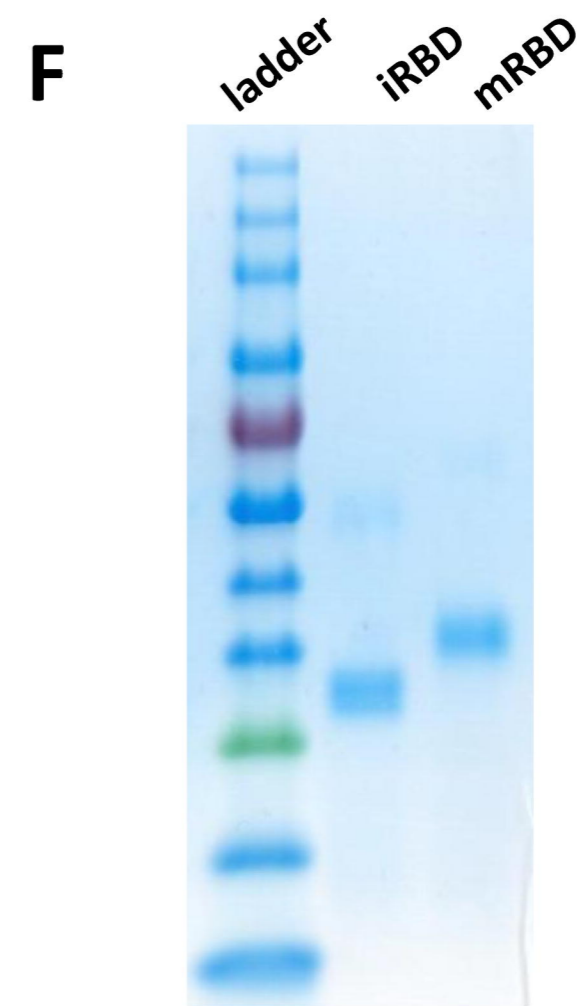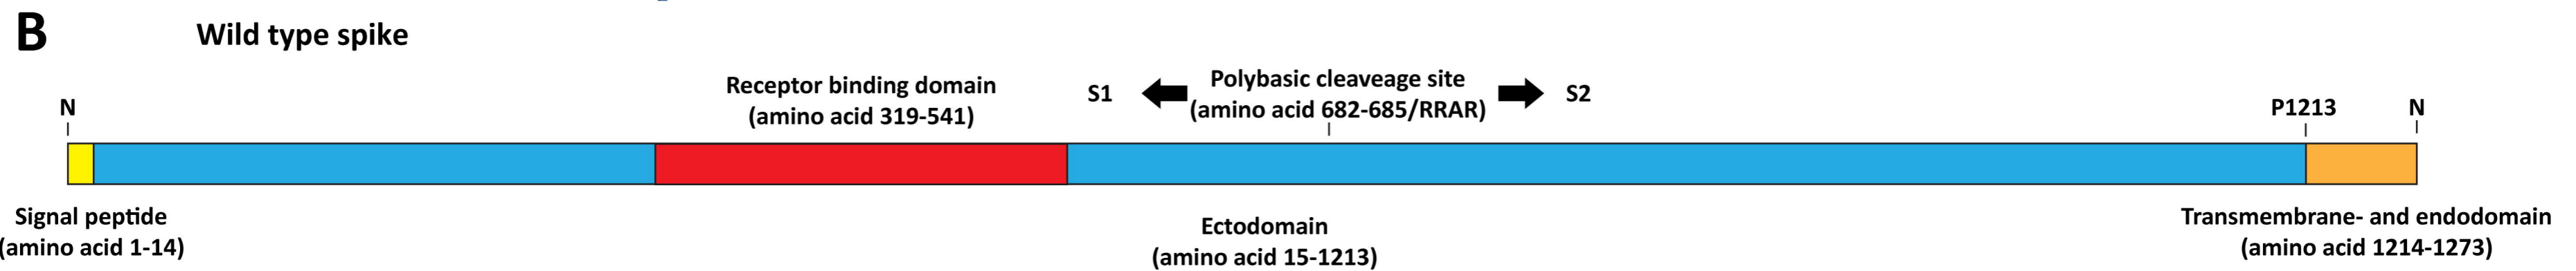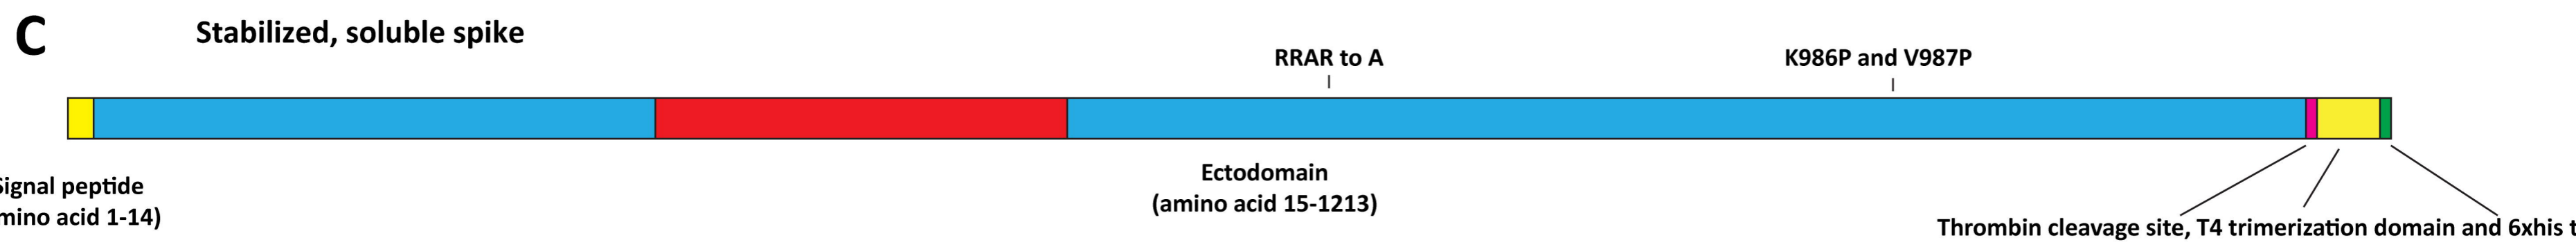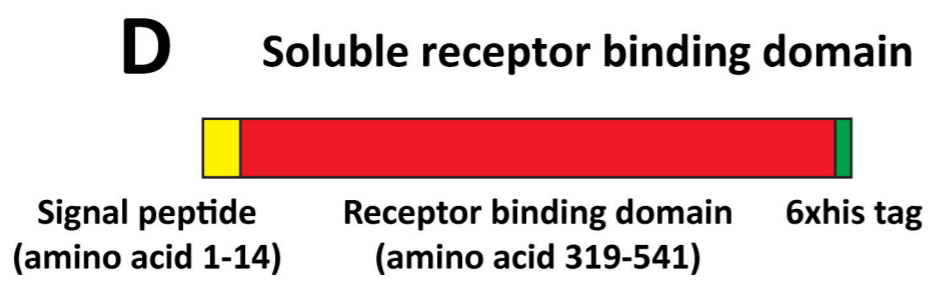

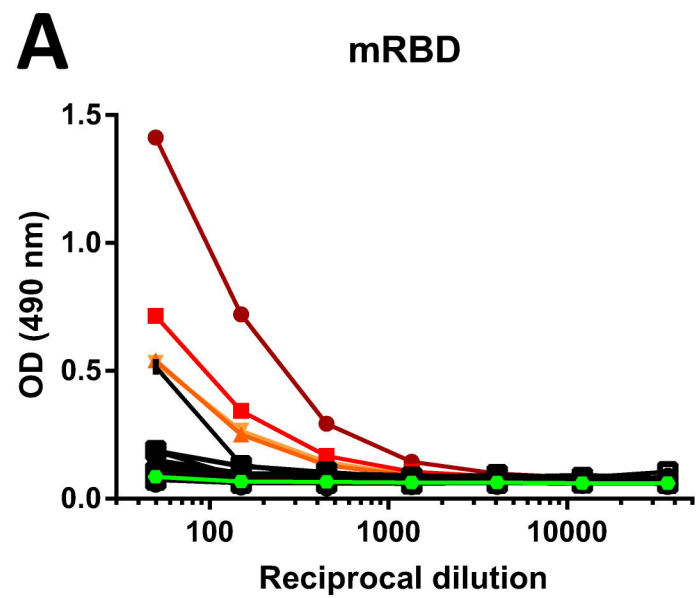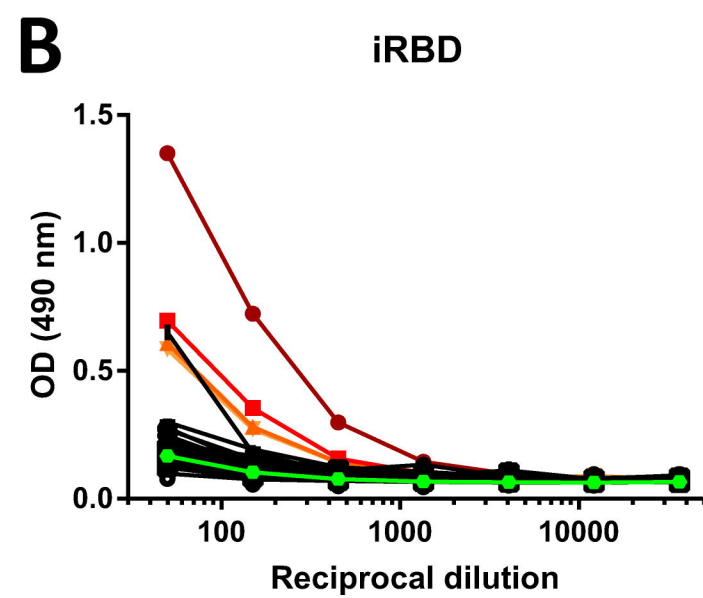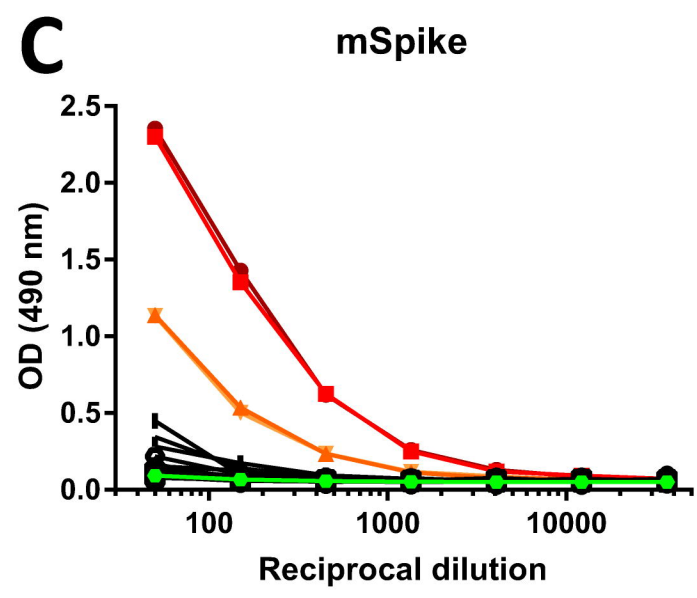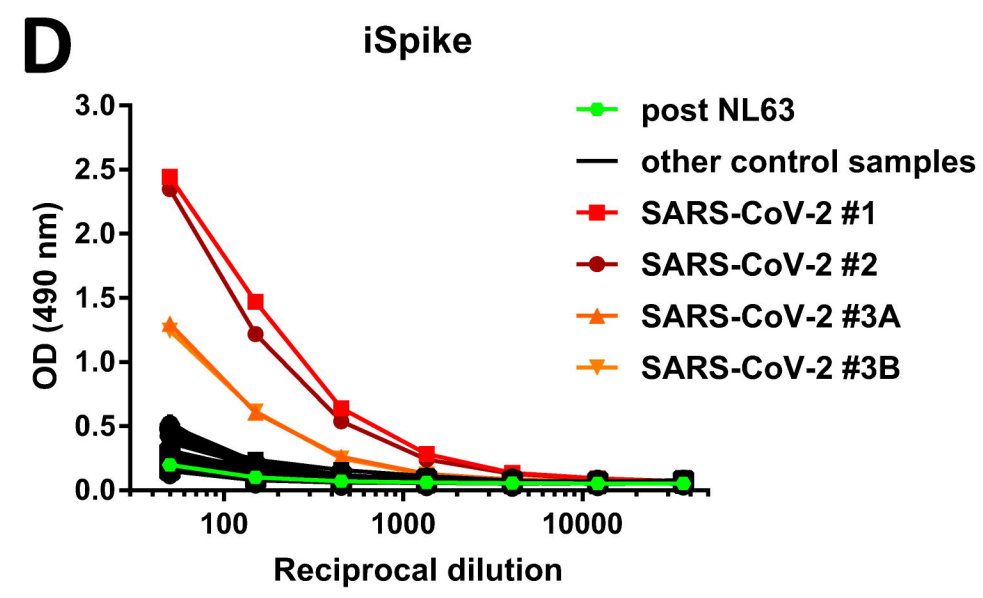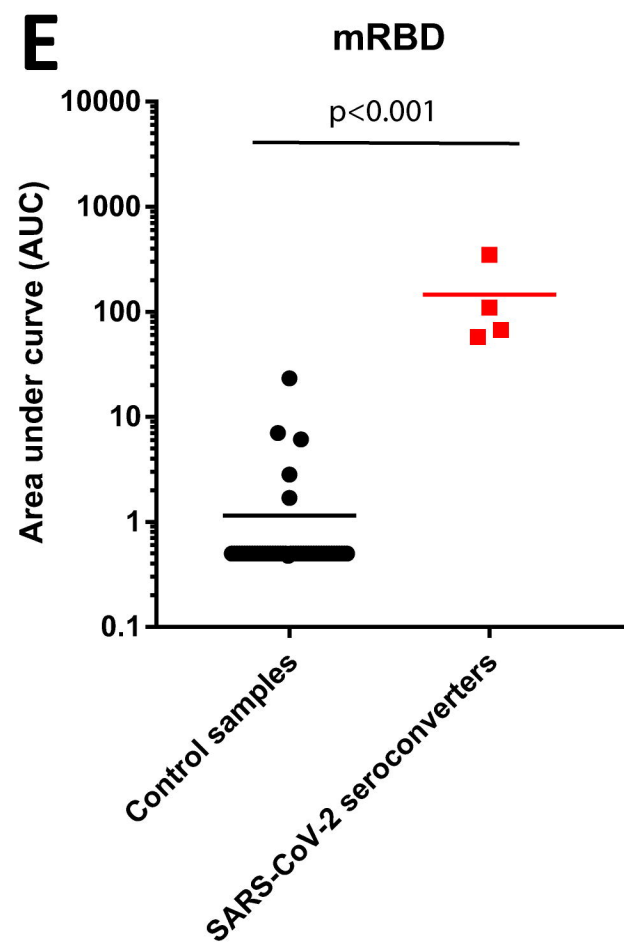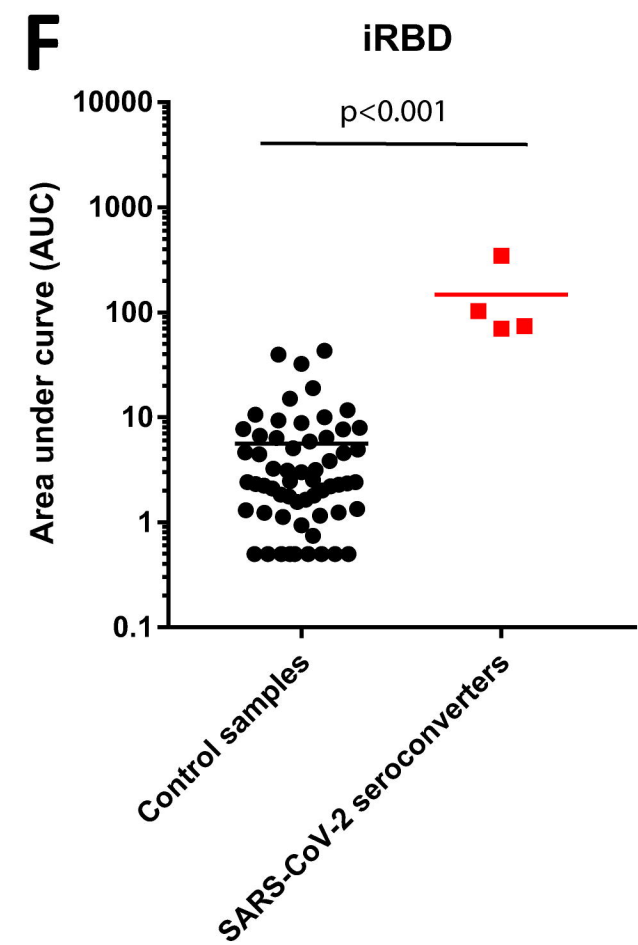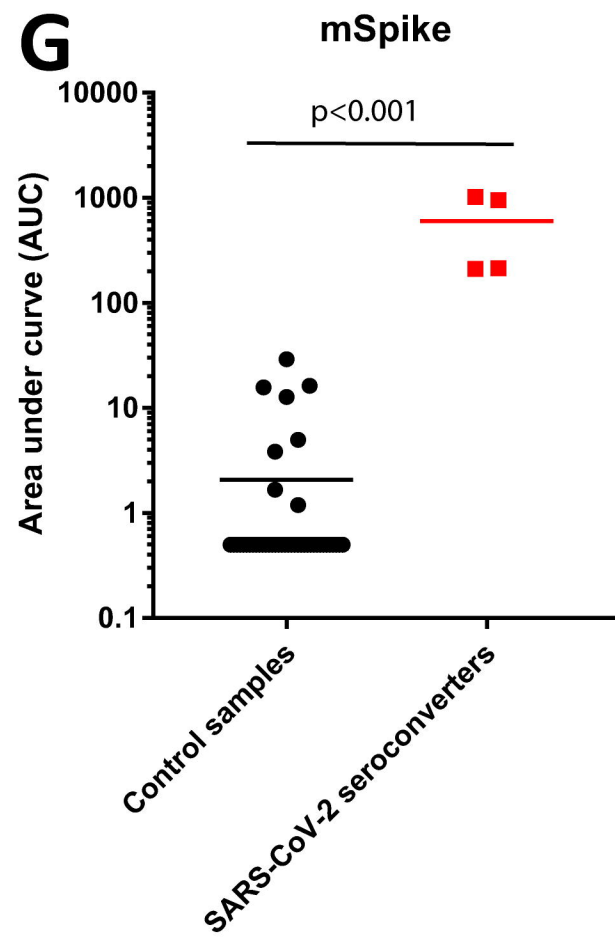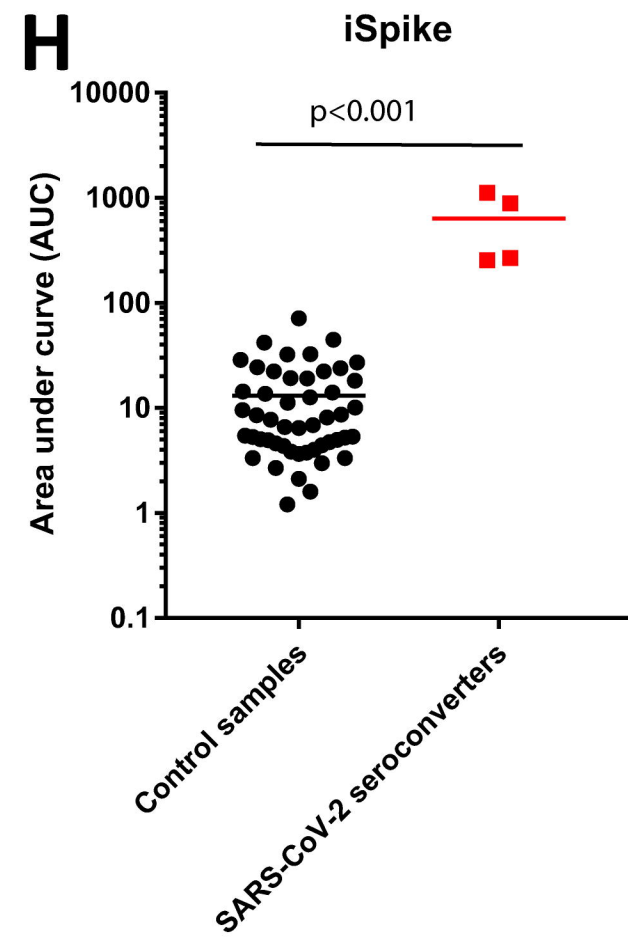

**A****mSpike isotyping**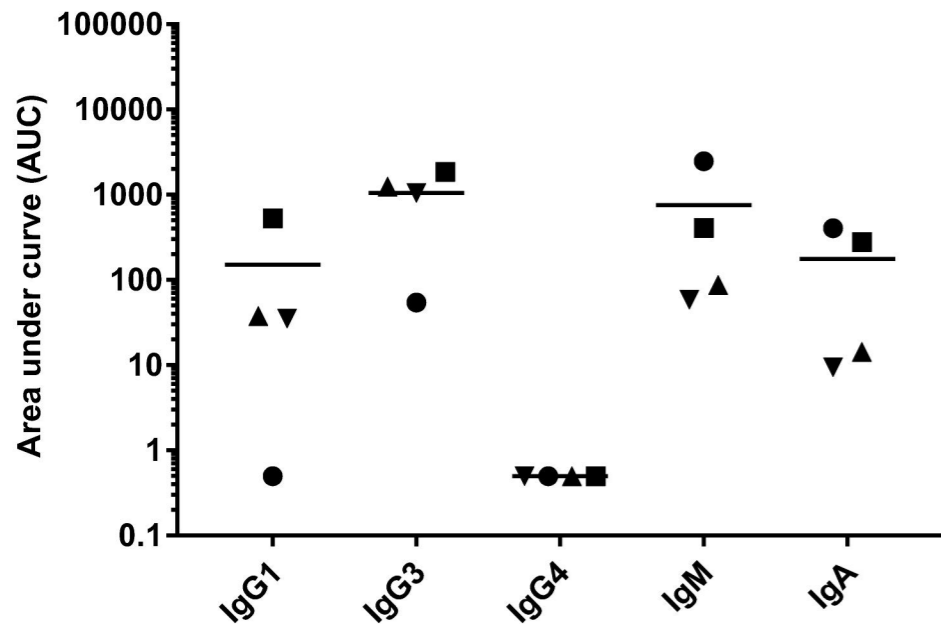**B****iSpike isotyping**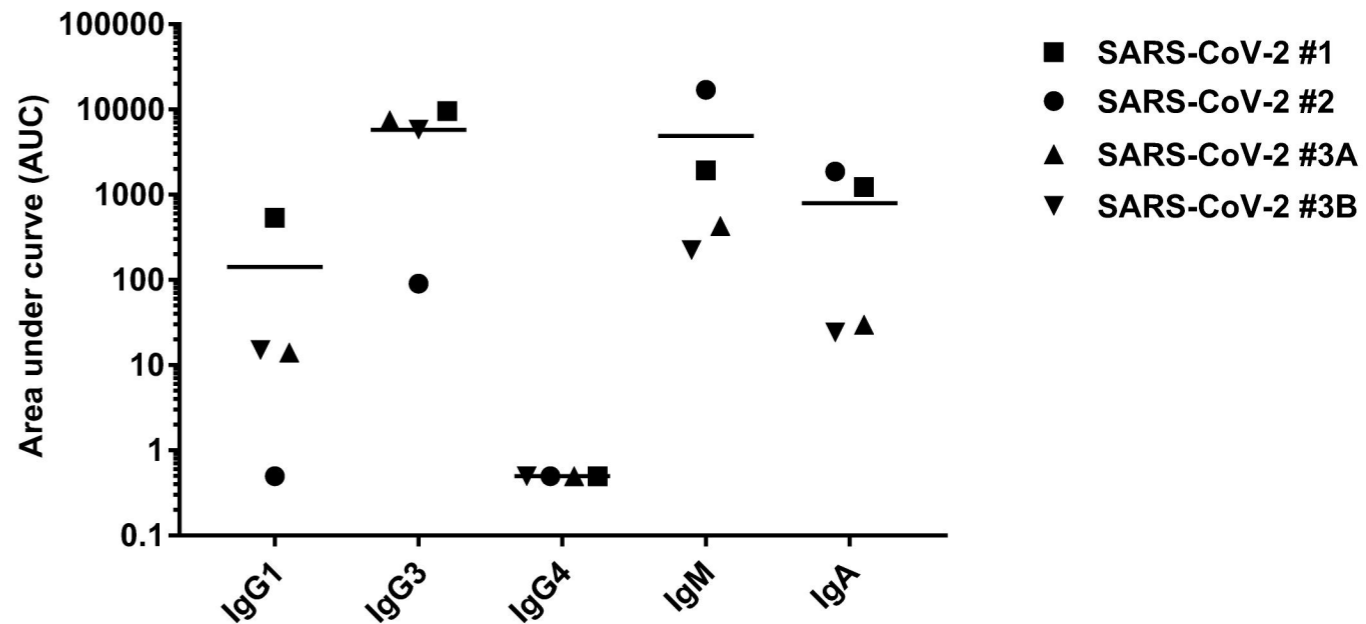

Source: https://medrxiv.org/content/medrxiv/early/2020/03/18/2020.03.17.20037713.full.pdf
